# Supplementary material for: Insights into Synergy of Copper and Acid Sites for Selective Catalytic Reduction of NO with Ammonia over Zeolite Catalysts
Source: MDPI journal article supplement (doi:10.3390/catal13020301), 2023-01-28
Supplement: s1 [file s1]

## Supplementary data

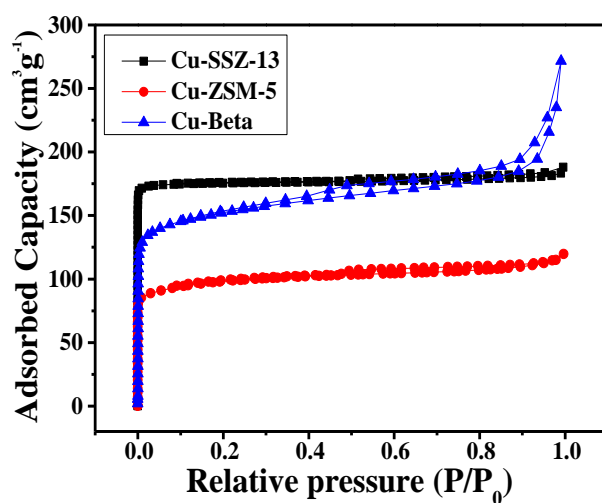

Figure S1. N<sub>2</sub> adsorption-desorption isotherms of the copper-based zeolites.

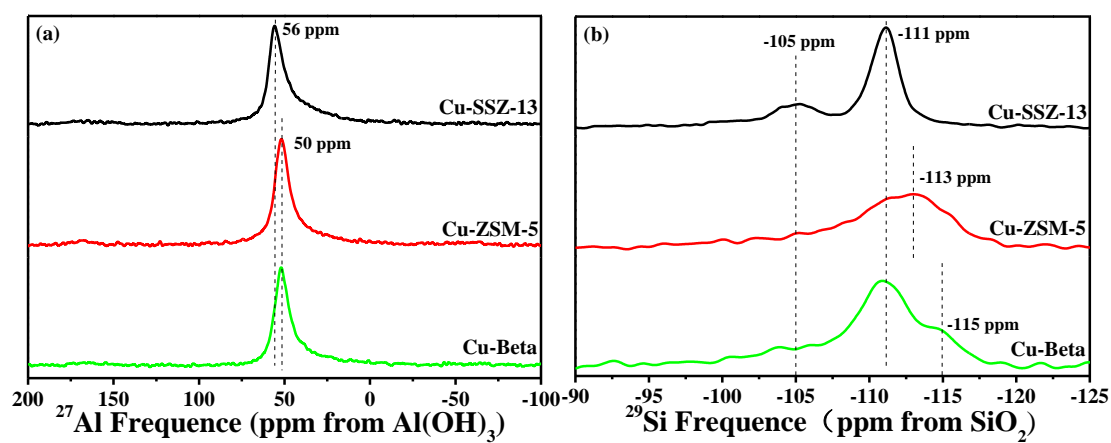

Figure S2. <sup>27</sup>Al (a) and <sup>29</sup>Si (b) NMR Spectra of the copper-based zeolites.
